# Supplementary material for: Lung-specific MCEMP1 functions as an adaptor for KIT to promote SCF-mediated mast cell proliferation
Source: PubMed Central journal article supplement (PMC10090139; doi:10.1038/s41467-023-37873-3), 2023-04-11

## Supplementary Table 1: Mass spectrometry peptide sequence

### SOS1

MQAQQLPYEF FSEENAPKWR GLLVPAKLV QGQVHPTLES NDDALQYVEE LILQLLNMLC QAQPRSASDV  
EERVQKSFPH PIDK**WAIADA OSAIEK**RKRR **NPLSLPVEKI** HPLLKEVLGY KIDHQVSVYI VAVLEYISAD  
ILKLVGNVVR NIRHYEITKQ DIKVMACADK VLMDMFHQDV EDINILSLTD EEPSTSGEQT YYDLVKAFMA  
EIRQYIRELN LIIK**VFREPF VSNSKLFSAN DVENIFSRIV DIHELKSVKLL** GHIEDTVEMT DEGSPHPLVG  
SCFEDLAEEL AFDPYESYAR DILRPGFHDR FLSQLSKPGA ALYLQSIGEG FK**EAVOYVLP RLL**LAPVYHC  
LHYFELLKQL EEKSEDEQEDK ECL**QAITAL LNVOSGMEKI** CSKSLAKRRL SESACRFYSQ QMKGKQLAIK  
KMNEIQ**NID GWEGK**DIGQC CNEFIMEGTL TRVGAKHERH IFLFDGLMIC CKSNHGQPR**L PGASNAEYRL**  
KEKFFMR**KVO INDKDDTNEY KHAFEIILKD ENSVIFSAK**S AEEKNNWMAA LISLQYRSTL ER**MLDVTMLQ**  
**EEKEOMRLP SADVYFAEP DSEENIIFEE NMOPK**AGIPI IKAGTVIKLI ER**LTYHMYAD PNFVRTFLTT**  
**YRSFCKPQEL** LSLIIE**FEI PEPEPTEADR IAIENGDOPL SAELKRFRKE YIOPVOLRVL** NVCRHWVEHH  
FYDFERDAYL LQR**MEEFIGT VR**GAMKK**WV ESITK**IIQRK KIARDNGPGH NITFQSSPPT VEWHSRPGH  
IETFDLLTLH PIEIAR**QLTL LESDLYRAVO PSELVGSVWT KEDKEINSPN LLK**MIR**HTTN LTLWFEK**CIV  
ETENLEERVA VVSRRIEILQ VFQELNNFNG VLEVVSAMNS SPVYR**LDHTF EOIPSRQKKI LEEAHELSED**  
**HYK**KYLAKLR SINPPCVPPF GIYLTN**LKTE EGNPEVLKR** HGKELINFSK RRVKVAEITGE IQQYQNPYC  
LRVESDIK**R FENLNPMGNS MEKEFTDYL NK**SLEIEPRN PKPLPRFPK YSYPLKSPGV RPSNPRPGTM  
**RHPTLQOEP RKISYSRIPE SETESTASAP NSPR**TPLTPP PASGASSTD VCSVFDSDHS SPFHSSNDTV  
FIQVTLPHG **RSASVSSISL TKGTDEVVPP PPVPPR**RPE SAPAESSPSK IMSKHLDSPP AIPPRQPTSK  
AYSPRYSISD RTSISDPPES PLLLPPEPV **RTPDVFS SSP LHLOPPPLGK** KSDHGNAFFP NSPSPFTPPP  
PQTPSPHGTR **RHLPSPPLTO EVDLHSSIAGP PVP**PRQSTSQ HIPKLPKTY KREHTPSMH **RDGPPLLENA HSS**

### SOS2

MQAQPQPYEF FSEENSPKWR GLLVSALRKV QEQVHPTLSA NEESLYYIEE LIFQLLNKLC MAQPRTVQDV EERVQKTFPH  
PIDKWAITADA QSAIEKRKRR NPLLLPVDKI HPSLKEVLGY KVDYHVSLEYI VAVLEYISAD ILK**LAGNYVF NIRHYEISOO**  
**DIK**VSMCADK VLMDMFQDD IGLVSLCEDE PSSSGELNYY DLVRTEIAEE RQYLRELNMI IKVFR**EAFLS DR**KLFKPSDI  
EKIFSNISDI HELTVKLLGL IEDTVEMTDE SSPHPLAGSC FEDLAEQAF DPYETLSQDI LSPEFHEHFN KLMARPAVAL  
HFQSIADGFK EAVRYVLPRL MLVPVYHCWH YFELKQLKA CSEEQEDREC LNQAITALMN LQGSMDRIYK QYSPRRRPGD  
PVCPPYSHQL RSKHLAIKKM NEIQKNIDGW EGKDIGQCCN EFIMEGPLTR IGAKHERHIF LFDGLMISCK PNHGQTR**LPG**  
**YSSAEYR**LKE KFMVKIQC DKEDTCEHK **AFELVSKDEN SIIFAAK**SAE EKNWMAALI SLHYRSTLDR **MLDSVLLKEE**  
**NEOPLR**LPS EVYRFVVK**DS EENIVFEDNL OSRSGIPIK** GGTVVKLIER LTYHMYADPN FVRTFLTTYR SFCKPQELLS  
LLIER**FEIPE PEPTDADKLA** IEK**GEOPISA DLK**RFR**KEYV OPVOLR**ILNV FRHWVEHHFY DFERDLELLE **RLESFISSVR**  
GKAMKKWVES IAKIIRKKQ AQANGVSHNI TFESPPPPIE WHISKPGQFE TFDLMTLHPI EIARQLTLE SDLYRKVQPS  
ELVGSVWTK EKEINSPNLL KMIRHTNLT LWFEKIVEA ENFEERVAVL SRIEILQVF QDLNNEFNGVL EIVSAVNSVS  
VYRLDHTFEA LQERKR**KILD EAVELSODHF K**KYLKLSI NPPCVPPFGI YLTN**LKTEE GNNDFLK**KK**G KDLINFSK**RR  
KVAEITGEIQ QYQNPYCLR IEPDMRR**FFE NLNPMGSASE KE**FTDYLFNK SLEIEPRNCK QPRFRPKST FSLKSPGIRP  
NTGR**HGSTG TLR**CHPTLE REPCKISFSR IAETELESTV SAPTSPNTPS TPPVSASSDL SVFLDVLDNS SCGSNSIFAP  
VLLPHSKSFF SSCGSLHK**LS EEPLIPPLP PR**KKFDHDAS NSKGNMK**SDD DPPAIPPRQP** PPPKVKR**VP VPTGAFDGPL**  
**HSPPPPPPRD** PLPDTPPPVP LRPPEHFINC PFNLQPPPLG HLHRSDWLR DISTCPNSPS TPPSTPSRV PRCYVLSSS  
QNNLAHPAP VPPPRQSSP HLPKLPKTY KRELSHPPLY **RLPLENAET PO**

### Grb2

MEATAKYDFK **ATADDELSFK** RGDILKVLNE ECDQNWYKAE LNGKDGFIKP NYIEMKHPW FFGKIPRAKA **EEMLSKQRHD GAFLIRESES APGDFSLSVK**  
**FGNDVOHFKV** LRDGAGKYFL VVWFNSLNE LVDYHRSTSV SRNQIFLRD IEQMPQPTY VQALFDFDPQ EDGELGFRRG DFIVMDNSD PNWWKGACHG  
QTGMFPRNYV TPVNRNV

**Supplementary Table 2: List of antibodies used for immunoblotting**

| Antibody       | Catalog                        | Dilution                   | Time      |
|----------------|--------------------------------|----------------------------|-----------|
| MCEMP1         | N/A                            | 1:1000 in 5 % milk in TBST | 18 h, 4°C |
| Phospho-KIT    | Cell Signaling, 3391S          | 1:1000 in 5% BSA in TBST   | 18 h, 4°C |
| KIT            | Cell Signaling, 3074S          | 1:2000 in 5% BSA in TBST   | 18 h, 4°C |
| SOS1           | Cell Signaling, 12409S         | 1:1000 in 5% BSA in TBST   | 18 h, 4°C |
| Grb2           | Santa Cruz, C-23               | 1:1000 in 5% BSA in TBST   | 18 h, 4°C |
| 4G10           | EMD Millipore, 05-321          | 1:1000 in 5% BSA in TBST   | 18 h, 4°C |
| 4G10-HRP       | EMD Millipore, 16-105          | 1:1000 in 5% BSA in TBST   | 18 h, 4°C |
| P-Tyr-1000     | Cell Signaling, 8952S          | 1:1000 in 5% BSA in TBST   | 18 h, 4°C |
| Phospho-IkBa   | Cell Signaling, 9241S          | 1:1000 in 5% BSA in TBST   | 18 h, 4°C |
| IkBa           | Cell Signaling, 4814S          | 1:1000 in 5% BSA in TBST   | 18 h, 4°C |
| Phospho-MEK1/2 | Cell Signaling, 9154S          | 1:1000 in 5% BSA in TBST   | 18 h, 4°C |
| MEK1/2         | Cell Signaling, 9122S          | 1:1000 in 5% BSA in TBST   | 18 h, 4°C |
| Phospho-p38    | Cell Signaling, 9211S          | 1:1000 in 5% BSA in TBST   | 18 h, 4°C |
| p38            | Cell Signaling, 9212S          | 1:1000 in 5% BSA in TBST   | 18 h, 4°C |
| Phospho-JNK    | Cell Signaling, 9251S          | 1:1000 in 5% BSA in TBST   | 18 h, 4°C |
| JNK            | Cell Signaling, 4668S          | 1:1000 in 5% BSA in TBST   | 18 h, 4°C |
| Phospho-ERK    | Cell Signaling, 4370S          | 1:1000 in 5% BSA in TBST   | 18 h, 4°C |
| ERK            | Cell Signaling, 4695S or 9101S | 1:1000 in 5% BSA in TBST   | 18 h, 4°C |
| GST            | Santa Cruz, B-14               | 1:1000 in 5 % milk in TBST | 18 h, 4°C |
| Actin          | Santa Cruz, C4                 | 1:1000 in 5 % milk in TBST | 18 h, 4°C |
| Tubulin        | Santa Cruz, B7                 | 1:1000 in 5 % milk in TBST | 18 h, 4°C |
| rabbit-Flag    | Sigma, F7425                   | 1:1000 in 5 % milk in TBST | 18 h, 4°C |
| mouse-Flag     | Sigma, F1804                   | 1:1000 in 5 % milk in TBST | 18 h, 4°C |
| rabbit-HA      | Covance, PRB-101P              | 1:1000 in 5 % milk in TBST | 18 h, 4°C |
| mouse-HA       | BioLegend, 16B12               | 1:1000 in 5 % milk in TBST | 18 h, 4°C |
| mouse Flag-HRP | abcam ab49763, M2              | 1:4000 in 5 % milk in TBST | 1 h, 23°C |
| mouse HA-HRP   | BioLegend 901519, 16B12        | 1:4000 in 5 % milk in TBST | 1 h, 23°C |

|                |                      |                            |           |
|----------------|----------------------|----------------------------|-----------|
| mouse V5-HRP   | Thermo R961-25       | 1:5000 in 5 % milk in TBST | 1 h, 23°C |
| mouse IgG-HRP  | Cell Signaling, 7076 | 1:1000 in 5 % milk in TBST | 1 h, 23°C |
| rabbit IgG-HRP | Cell Signaling, 7074 | 1:1000 in 5 % milk in TBST | 1 h, 23°C |

**Supplementary Table 3: List of qRT-PCR primers**

| Gene                | Sense primer (5'-3')   | Antisense primer (5'-3') |
|---------------------|------------------------|--------------------------|
| Mouse <i>Gapdh</i>  | GGTCCTCAGTGTAGCCCAAG   | AATGTGTCCGTCGTGGATCT     |
| Mouse <i>Il4</i>    | AGATGGATGTGCCAAACGTCC  | AATATGCGAAGCACCTTGGAA    |
| Mouse <i>Il5</i>    | TCACCGAGCTCTGTTGACAA   | CCACACTTCTCTTTTTGGCG     |
| Mouse <i>Il6</i>    | TATAATCAGGAAATTTGCCTA  | GTTAGGAGAGCATTGGAAAT     |
| Mouse <i>Il10</i>   | GCCAAGCCTTATCGGAAATG   | AAATCACTCTTCACCTGCTCC    |
| Mouse <i>Il13</i>   | TGCGGTTACAGAGGCCATGCA  | TGAGGAGCTGAGCAACATCAC    |
| Mouse <i>Tnf</i>    | CTTCTGTCTACTGAACTTCGGG | TGATCTGAGTGTGAGGGTCTG    |
| Mouse <i>Ifng</i>   | GCTTTGCAGCTCTTCCTCAT   | GTCACCATCCTTTTGCCAGT     |
| Mouse <i>Ccl2</i>   | CATCCACGTGTTGGCTCA     | GATCATCTTGCTGGTGAATGAGT  |
| Mouse <i>Ccl4</i>   | GCTCCAAGCCAGCTGTGGTA   | CGCTGGAGCTGCTCAGTTC      |
| Mouse <i>Ccl11</i>  | CAGATGCACCCTGAAAGCCATA | TGCTTTGTGGCATCCTGGAC     |
| Mouse <i>Ccr5</i>   | CGTTCCCCCTACAAGAGACT   | ACCCACAAAACCAAAGATGA     |
| Mouse <i>Cxcl10</i> | TGCTGGGTCTGAGTGGGACT   | CCCTATGGCCCTCATTCTCAC    |

**Supplementary Table 4: List of antibodies used for immunofluorescence**

| Antibody                             | Catalog                        | Dilution                     | Time         |
|--------------------------------------|--------------------------------|------------------------------|--------------|
| Phospho-JNK                          | Cell Signaling,<br>9255S       | 1:200<br>in 0.1% BSA in PBST | 18 h,<br>4°C |
| Phospho-MITF                         | Millipore Sigma,<br>SAB4503940 | 1:500<br>in 0.1% BSA in PBST | 18 h,<br>4°C |
| Alexa Fluor-488 Goat-anti-Rabbit IgG | Invitrogen, A11008             | 1:500<br>in 0.1% BSA in PBST | 1 h,<br>23°C |
| Alexa Fluor-568 Goat-anti-Rabbit IgG | Invitrogen, A11011             | 1:500<br>in 0.1% BSA in PBST | 1 h,<br>23°C |
| Hoechst 33342                        | Invitrogen, H3570              | 1:5000                       | N/A          |

**Supplementary Table 5: List of antibodies used for flow cytometry**

| Antibody                   | Catalog                        | Dilution                        |
|----------------------------|--------------------------------|---------------------------------|
| CD45-APC-Cy7               | clone 30-F11; BD, 557659       | 1:100                           |
| KIT(CD117)-PE              | clone 2B8; BD, 553355          | 1:200                           |
| FcεRI-Alexa488             | clone MAR-1, Biolegend, 134330 | 1:200                           |
| Mouse Lineage Cocktail-APC | BD, 558074                     | 10 µl / 5x10 <sup>5</sup> cells |
| Ly-6G-APC                  | clone 1A8; Biolegend, 127614   | 1:200                           |
| Ly-6C-BV650                | clone HK1.4; Biolegend, 128049 | 1:200                           |
| CD11b-Alexa488             | clone M1/70; BD, 557672        | 1:200                           |
| CD11c-BV421                | clone HL3; BD, 562782          | 1:200                           |
| Siglec-F-PE                | clone E50-2440; BD, 552126     | 1:200                           |
| LIVE/DEAD Fixable Blue     | Thermo Fisher, L34962          | 1 µl / million cells            |
| CD16/CD32                  | BD, 553142                     | 1 µg (2 µl) / million cells     |



**Supplementary Figure 1 MCEMP1 interacts with Grb2-SOS signal complex and induces ITAM-dependent signal transduction.**

**a**, ITAM motif sequence alignment of MCEMP1 from human and mouse. The conserved YENI residue is shown in red font. **b**, Schematics of *TKX1* expression system and identification of SOS1/2 as the phosphorylated MCEMP1 interacting proteins. *E. coli TKX1* strain contains elk tyrosine kinase which has broad specificity and efficiently phosphorylates mammalian proteins. *TKX1* strain was transformed with GST-tagged plasmids encoding human MCEMP1 cytoplasmic domain (MCEMP1-C) either wild-type (GST-WT) or tyrosine to phenylalanine mutant (GST-YF). Purified GST-tagged MCEMP1 proteins were incubated with HMC-1 cell lysates. MCEMP1 protein complexes were enriched by GST-pulldown and visualized on silver stained-SDS-PAGE. Mass spectrometry identified SOS1/2 from 150 kDa size band in GST-WT lane. **c**, Identification of Grb2 as the phosphorylated MCEMP1 interacting protein. MCEMP1 proteins were purified from C57 cells expressing vector control (VEC) or wild-type MCEMP1 (WT) by immunoprecipitation (IP) with anti-Flag antibody. MCEMP1 protein complexes were visualized on silver stained-SDS-PAGE. Mass spectrometry identified Grb2 from 25 kDa size band of WT MCEMP1. **d**, GST-pulldown assay of MCEMP1 interaction with Grb2-SOS1/2 signal complex in an ITAM dependent manner. GST-pulldown elutes and whole cell lysates (WCL) were analyzed by immunoblotting (IB) with the indicated antibodies. **e**, Effect of SOS SH3 domain inhibitor on MCEMP1 interaction with SOS in 293T cells. **f**, MCEMP1 tyrosine phosphorylation and its interaction with Grb2 and SOS1 in HMC-1 cells. HMC-1 cells expressing VEC, WT MCEMP1, or YF mutant MCEMP1 were treated with  $\alpha$ Flag for the indicated time and cell lysates were IP with anti-Flag antibody. Immunoprecipitates and WCL were analyzed by IB with the indicated antibodies. **g**, Gene expressions of *Ilf6*, *Tnf*, *ccl4*, and *ccl11* in C57, DC2.4, or J774.1 cells after  $\alpha$ Flag treatment. Data are representative of at least two independent experiments in **b-f**. Data are presented by mean  $\pm$  s.e.m. and *p*-values were determined by two-way ANOVA with Sidak's multiple comparison in **g** (n=3). ns, not significant.



**a**  
*Mcemp1*<sup>+/+</sup> ATGCATGCATCAGCCTCCAGGATAAGAACCGGAGGA  
*Mcemp1*<sup>-/-</sup> ATGCATGCATCAGCCTCCAGGA-----GGA  
 11bp deletion

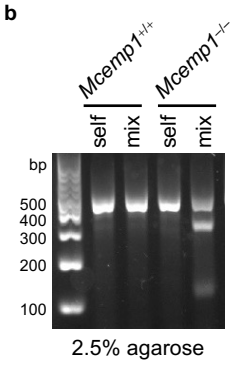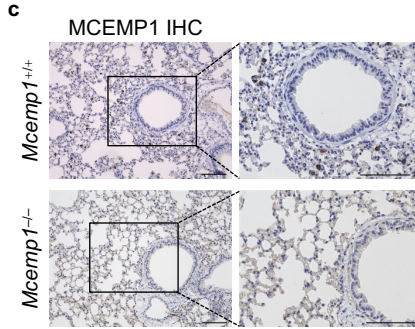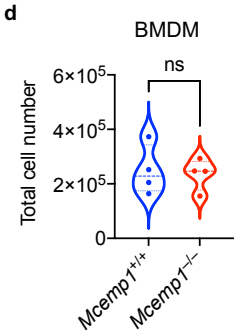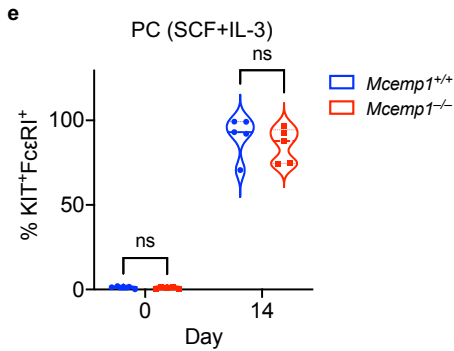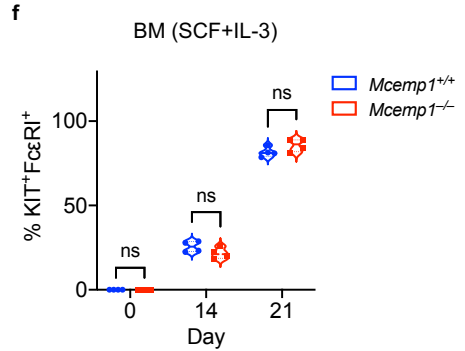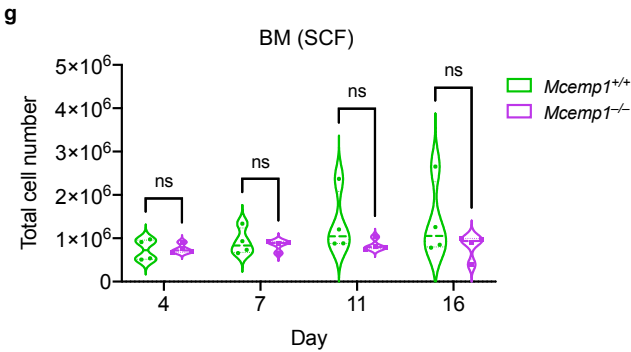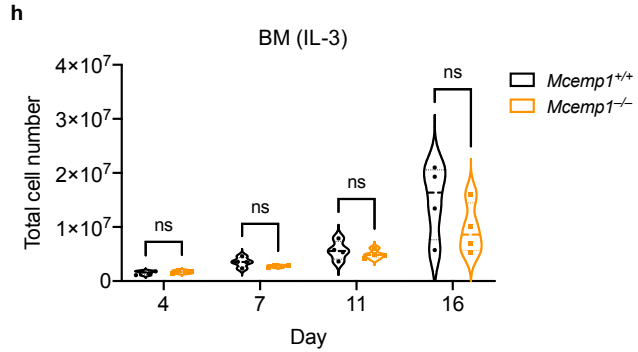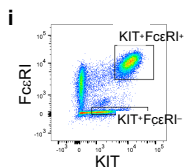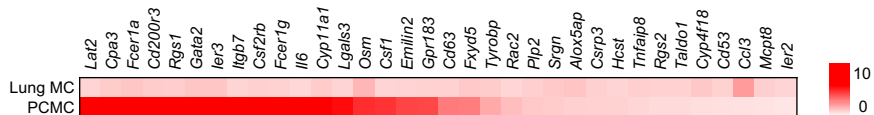

**Supplementary Figure 2    Generation of *Mcemp1*<sup>-/-</sup> mice.**

**a**, Genomic DNA sequence of the first coding region of *Mcemp1* from *Mcemp1*<sup>+/+</sup> or *Mcemp1*<sup>-/-</sup> littermate mice. 11 base pairs out-of-frame deletion was shown in *Mcemp1*<sup>-/-</sup> mice. **b**, Genotyping of *Mcemp1*<sup>+/+</sup> and *Mcemp1*<sup>-/-</sup> mice by T7 endonuclease I assay. bp, base pair. **c**, Loss of MCEMP1 protein expression in *Mcemp1*<sup>-/-</sup> mice. Immunohistochemistry staining for MCEMP1 expression in the lungs. Scale bar, 100  $\mu$ m. **d**, Total cell numbers of *Mcemp1*<sup>+/+</sup> or *Mcemp1*<sup>-/-</sup> bone marrow-derived macrophages (BMDM) cultured with macrophage colony-stimulating factor (MCSF) for 7 days (n=4 per group). **e,f**, Percentages of KIT/Fc $\epsilon$ RI double-positive PC (e) or BM (f) from *Mcemp1*<sup>+/+</sup> or *Mcemp1*<sup>-/-</sup> mice upon SCF and IL-3 stimulation (n=4-5 per group). **g,h**, Absolute cell counts of *Mcemp1*<sup>+/+</sup> or *Mcemp1*<sup>-/-</sup> BM cultured with either SCF (g) or IL-3 (h) for the indicated days (n=4 per group). **i**, Representative flow cytometry plots illustrating the gating strategy to identify KIT and Fc $\epsilon$ RI double positive cells (KIT<sup>+</sup>Fc $\epsilon$ RI<sup>+</sup>) and KIT single positive cells (KIT<sup>+</sup>Fc $\epsilon$ RI<sup>-</sup>). Heatmaps of top DEGs of KIT<sup>+</sup>Fc $\epsilon$ RI<sup>+</sup> PCMC versus KIT<sup>+</sup>Fc $\epsilon$ RI<sup>-</sup> cells and lung mast cells (MC) versus other lung cells. Images are representative of two independent experiments in **b** and **c**. Data are presented as violin plots with lines at median and quartiles in **d-h**. *P*-values were determined by two-tailed unpaired *t*-test in **d** and by two-way ANOVA with Sidak's multiple comparison in **e-h**. ns, not significant.

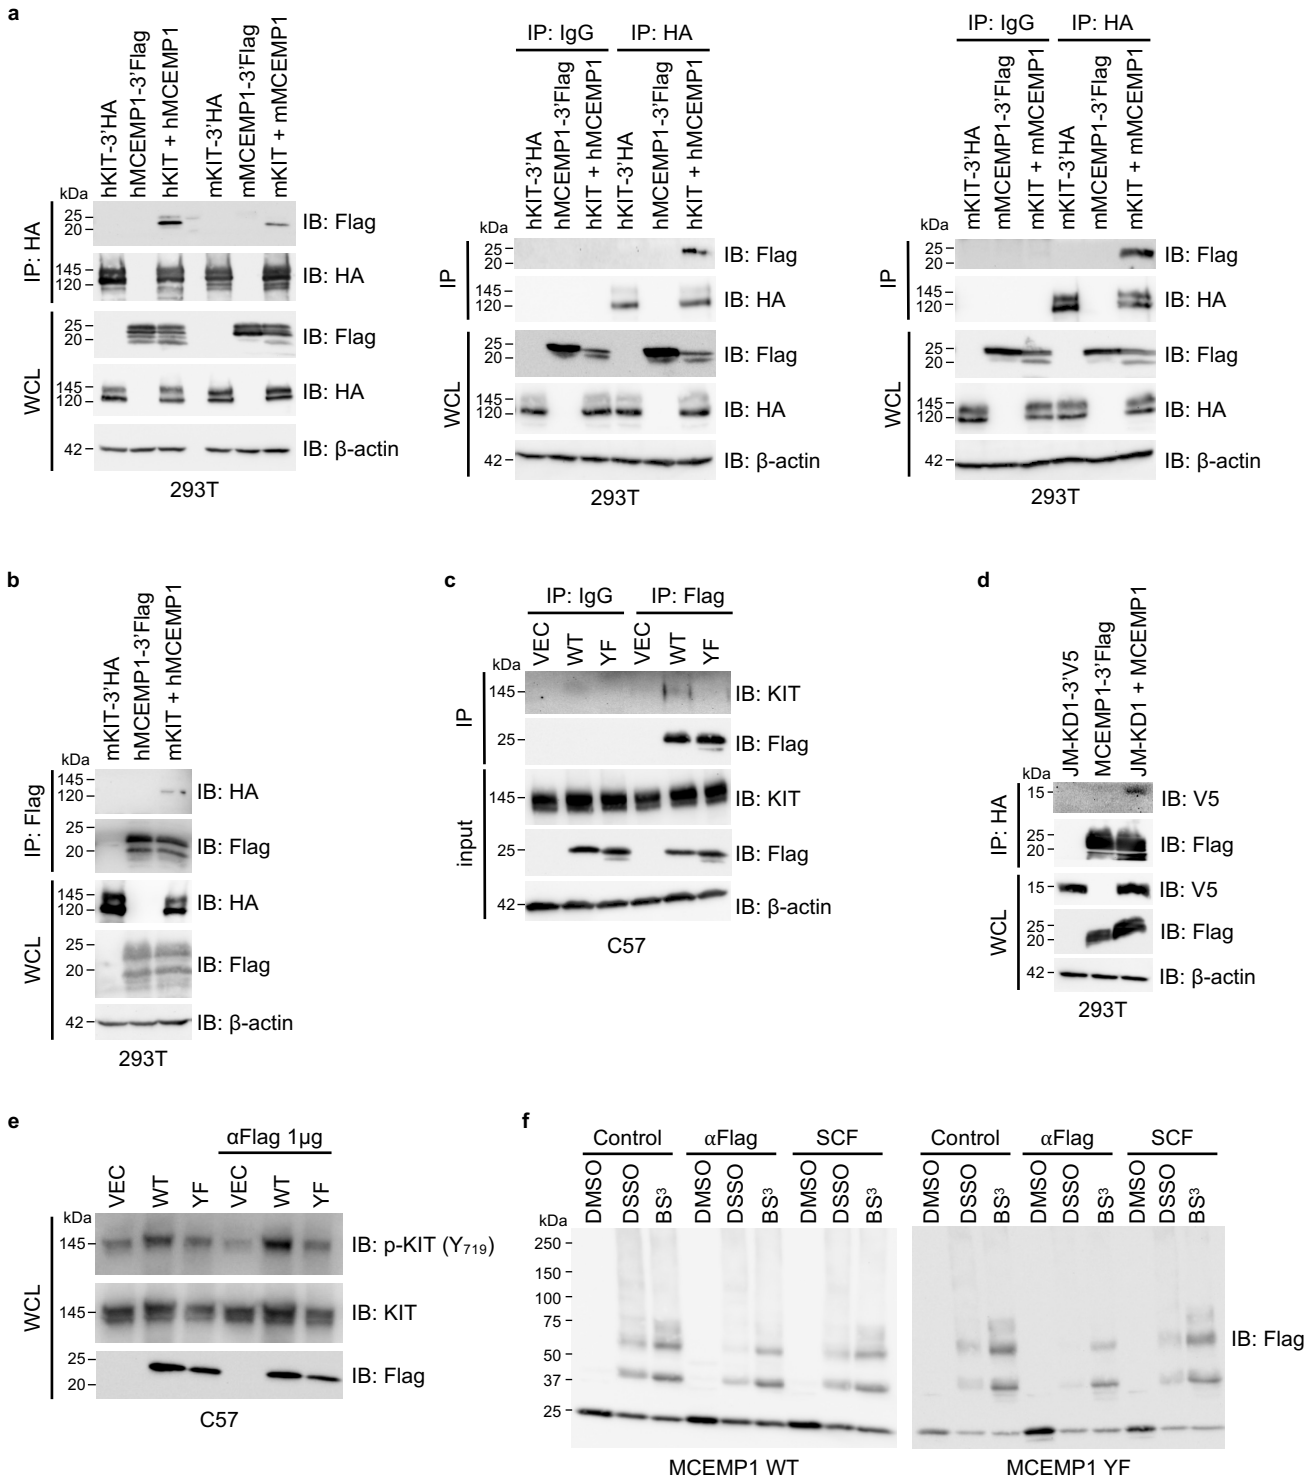

**Supplementary Figure 3 MCEMP1 enhances KIT autophosphorylation.**

**a**, Co-immunoprecipitation assay for human and mouse MCEMP1 and KIT interaction in 293T cells. **b**, Co-immunoprecipitation assay of human MCEMP1 and mouse KIT in 293T cells. **c**, Co-immunoprecipitation assay of MCEMP1 and KIT in C57 cells expressing vector (VEC), wild-type MCEMP1 (WT), or YF mutant (YF). Cell lysates were immunoprecipitated with anti-Flag antibody or IgG control. **d**, Co-immunoprecipitation assay for MCEMP1 interaction with KIT truncation construct (JM-KD1) in 293T cells. **e**, Immunoblot analysis of KIT phosphorylation upon  $\alpha$ Flag stimulation in C57 cells. **f**, MCEMP1 oligomers captured by disuccinimidyl suberate (DSS) or bis(sulfosuccinimidyl) suberate (BS<sup>3</sup>) non-cleavable crosslinkers. C57 cells expressing MCEMP1 WT or YF mutant were stimulated with control,  $\alpha$ Flag, or SCF and then subjected to 2.5 mM DSS or BS<sup>3</sup> crosslinking for 30 min. Crosslinked cells were used for immunoblotting with anti-Flag antibody. Data are representative of at least two independent experiments in **a-f**.

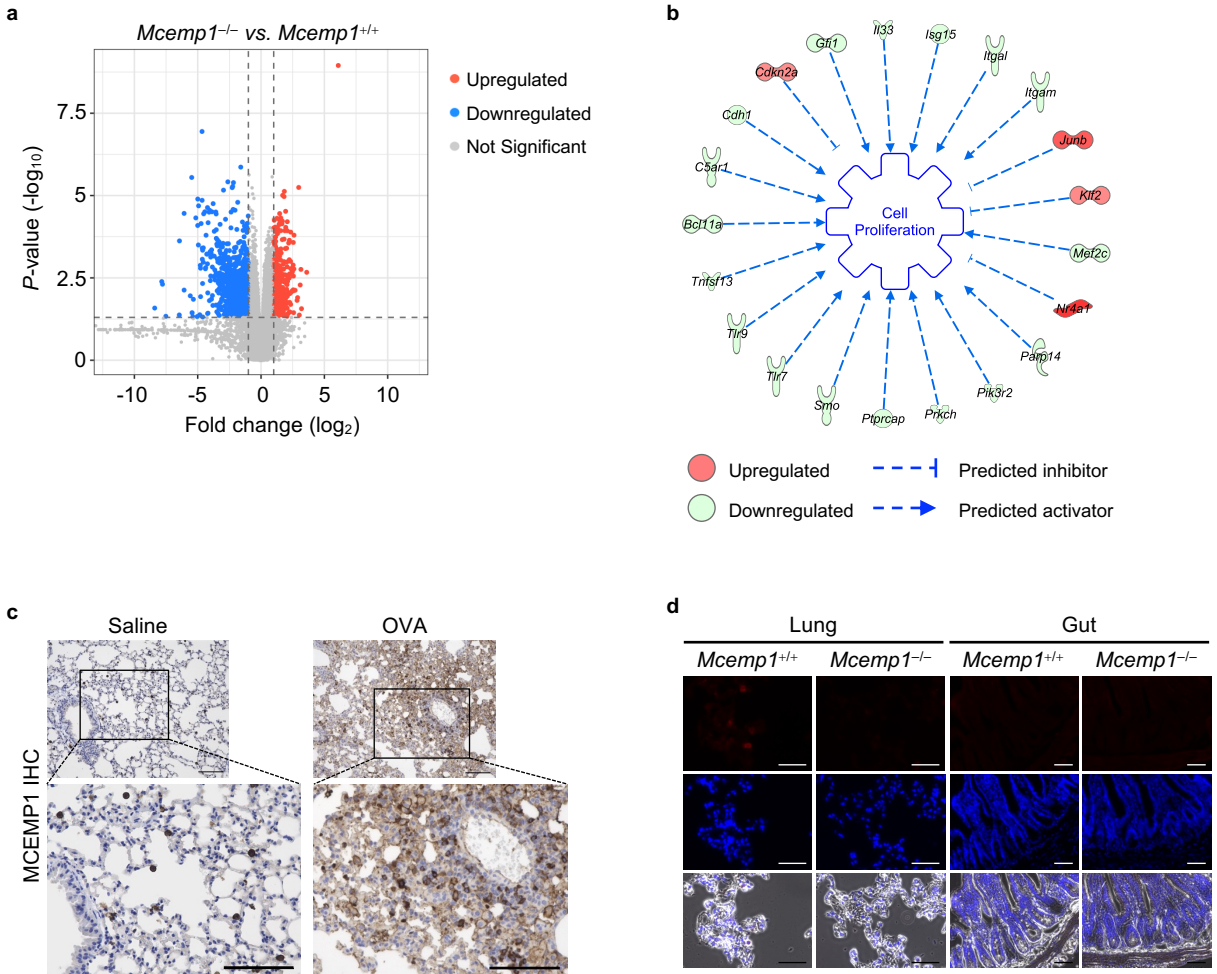

**Supplementary Figure 4      Altered gene expressions in *Mcemp1*-deficient PCMC and MCEMP1 expression in the lungs during OVA stimulation.**

**a**, RNA-seq volcano plot of DEGs from *Mcemp1*<sup>-/-</sup> PCMC versus *Mcemp1*<sup>+/+</sup> PCMC. The volcano plot is presented as fold change in gene expression ( $\log_2$  Fold change) against significance of change ( $-\log_{10}$  *P*-value). The significantly upregulated genes are indicated in red and downregulated gene are indicated in blue. The cutoff of significant DEGs is a  $|\text{Fold change}| > 2$  and *P*-value  $< 0.05$ . *p*-values in b-d were determined by Gene Specific Analysis (GSA) in Partek Flow software. **b**, IPA network association of DEGs from *Mcemp1*<sup>-/-</sup> PCMC versus *Mcemp1*<sup>+/+</sup> PCMC. Downregulated and upregulated genes are shown in green and red, respectively. **c**, Immunohistochemistry staining for MCEMP1 expression in the lung challenged with OVA. Scale bar, 100  $\mu\text{m}$ . **d**, Immunofluorescent staining of MCEMP1 expression in the lung and gut of *Mcemp1*<sup>+/+</sup> and *Mcemp1*<sup>-/-</sup> mice challenged with OVA. Anti-MCEMP1 antibody (red) or DAPI (blue). Scale bar, 50  $\mu\text{m}$ . Data are representative of two independent experiments in **c,d**.

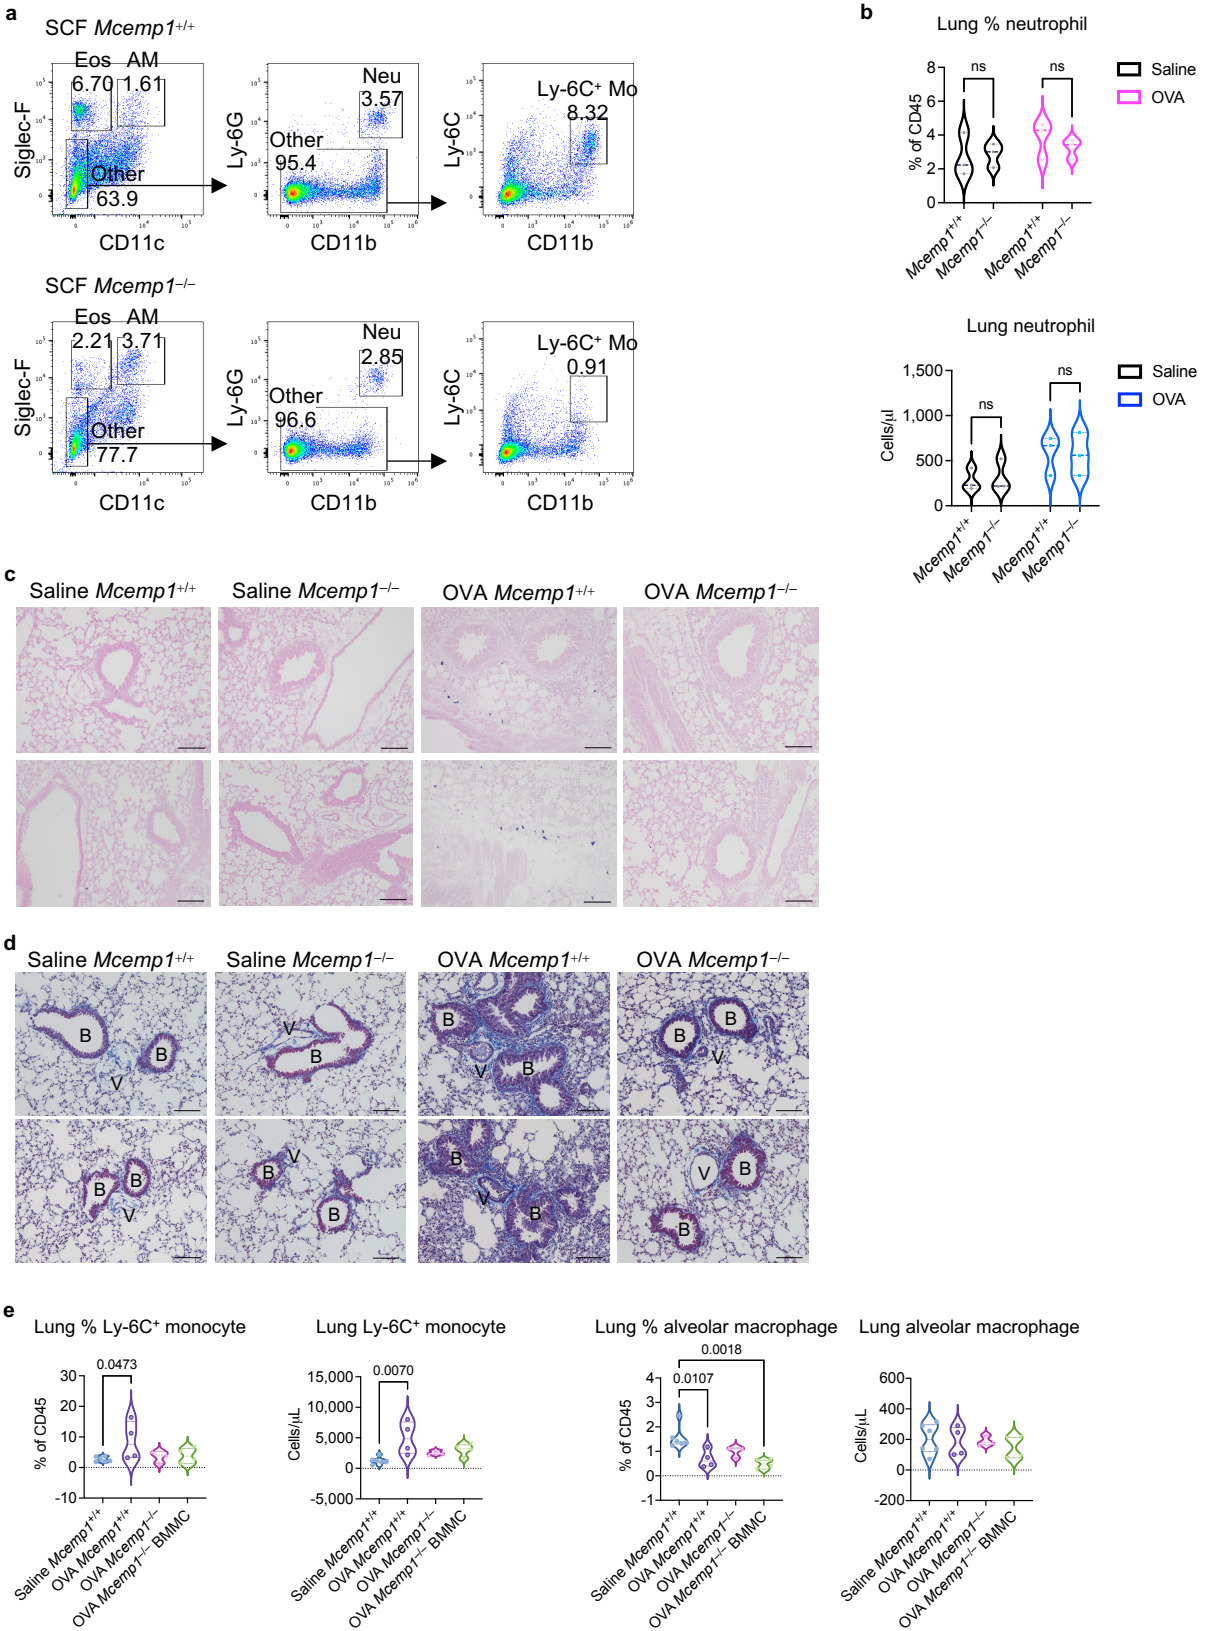

**Supplementary Figure 5 MCEMP1 exacerbates airway inflammation in OVA-induced chronic asthma model.**

**a**, Representative flow cytometry plots illustrating the gating strategy to identify eosinophils (Eos), alveolar macrophages (AM), neutrophils (Neu), and Ly-6C-positive inflammatory monocytes (Mo). **b**, Percentages and absolute numbers of neutrophils in the lung were determined by flow cytometry (n=3 per group). **c**, Representative images of toluidine blue staining for mast cell counts in lung section. Eosin was used for counterstaining. Scale bar, 100  $\mu\text{m}$ . **d**, Representative images of Masson's trichrome staining for collagen deposition. Collagen fibers were stained blue in the perivascular and parabronchial tissues. Scale bar, 100  $\mu\text{m}$ . **e**, Percentages and absolute numbers of Ly-6C+ inflammatory monocytes and alveolar macrophages in the lungs were determined by flow cytometry (n=6 for saline group. n=3-4 for OVA group). Data are representative of two independent experiments in **c** and **d**. Data are presented as violin plots with lines at median and quartiles and *p*-values were determined by two-way ANOVA with Sidak's multiple comparison in **b** or by one-way ANOVA with Tukey's multiple comparison in **e**. ns, not significant.

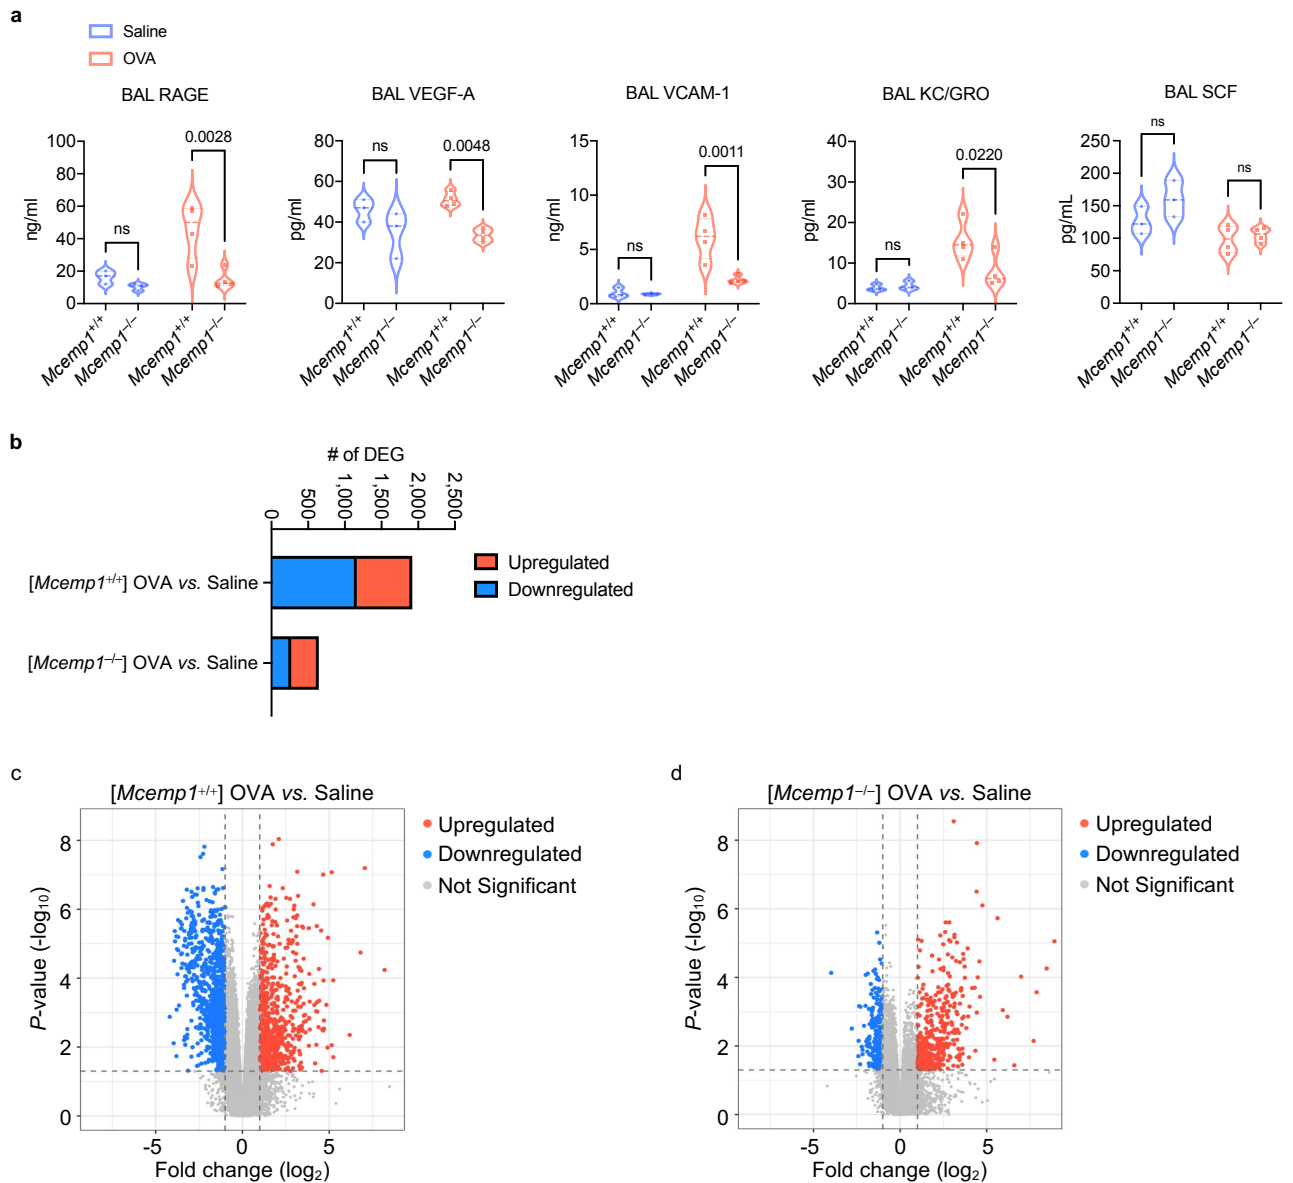

**Supplementary Figure 6 Altered gene expressions in *Mcemp1*-deficient mice.**

**a**, Multiplex analysis of cytokines and growth factors in the BAL ( $n=3$  for saline group,  $n=4$  for OVA group). Data are presented as violin plots with lines at median and quartiles and  $p$ -values were determined by two-way ANOVA with Sidak's multiple comparison. ns, not significant. **b**, The total number of significant DEGs from RNA-seq. The cutoff of significant DEGs is a  $|\text{Fold change}| > 2$  and  $P\text{-value} < 0.05$ . **c,d**, The volcano plots of DEGs from OVA-challenged versus saline-treated *Mcemp1*<sup>+/+</sup> mice (**c**) or OVA-challenged versus saline-treated *Mcemp1*<sup>-/-</sup> mice (**d**). The volcano plot is presented as fold change in gene expression ( $\log_2$  Fold change) against significance of change ( $-\log_{10} P\text{-value}$ ). The significantly upregulated genes are denoted in red and downregulated gene are indicated in blue.  $p$ -values were determined by Gene Specific Analysis (GSA) in Partek Flow software in **b-d**.



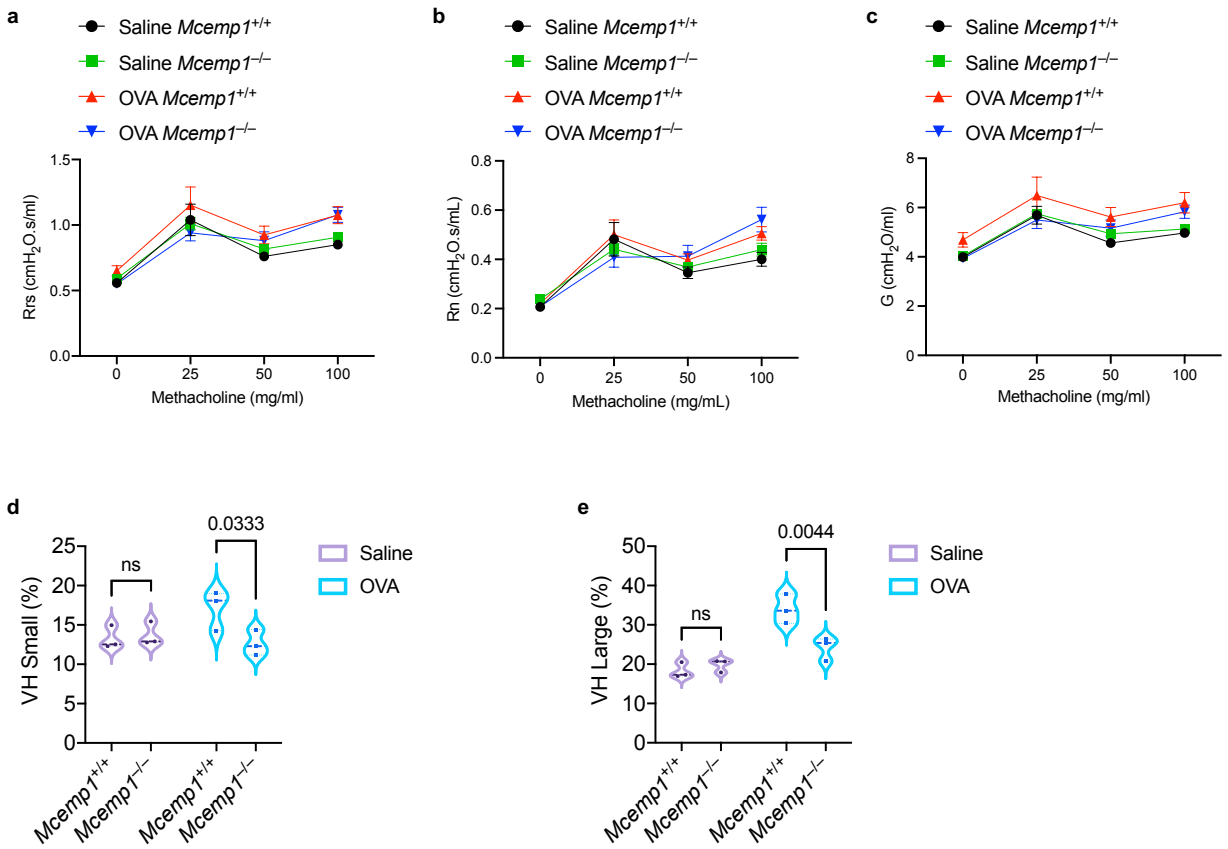

**Supplementary Figure 7 The effect of MCEMP1 deficiency on lung resistance and lung ventilation.**

**a,b,c** Lung function parameters, resistance of respiratory system (Rrs), newtonian resistance (Rn, central airway), and tissue damping (G, alveoli) in response to the indicated concentrations of methacholine were measured 1 day after the eighth intranasal challenge with OVA or saline (n=3 for saline group, n=4 for OVA group). **d,e**, Ventilation metrics; ventilation heterogeneity (VH) of small or large scale (n=3 per group). Data are presented as mean  $\pm$  s.d. in **a,b,c** and as violin plots with lines at median and quartiles in **d,e**. *P*-values were determined by two-way ANOVA with Sidak's multiple comparison in **d,e**. ns, not significant.

**Fig. 1b**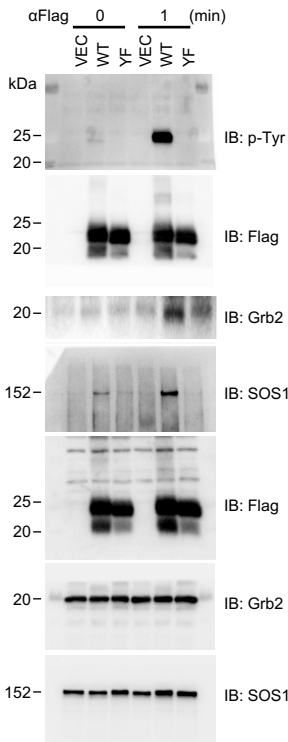**Fig. 1d**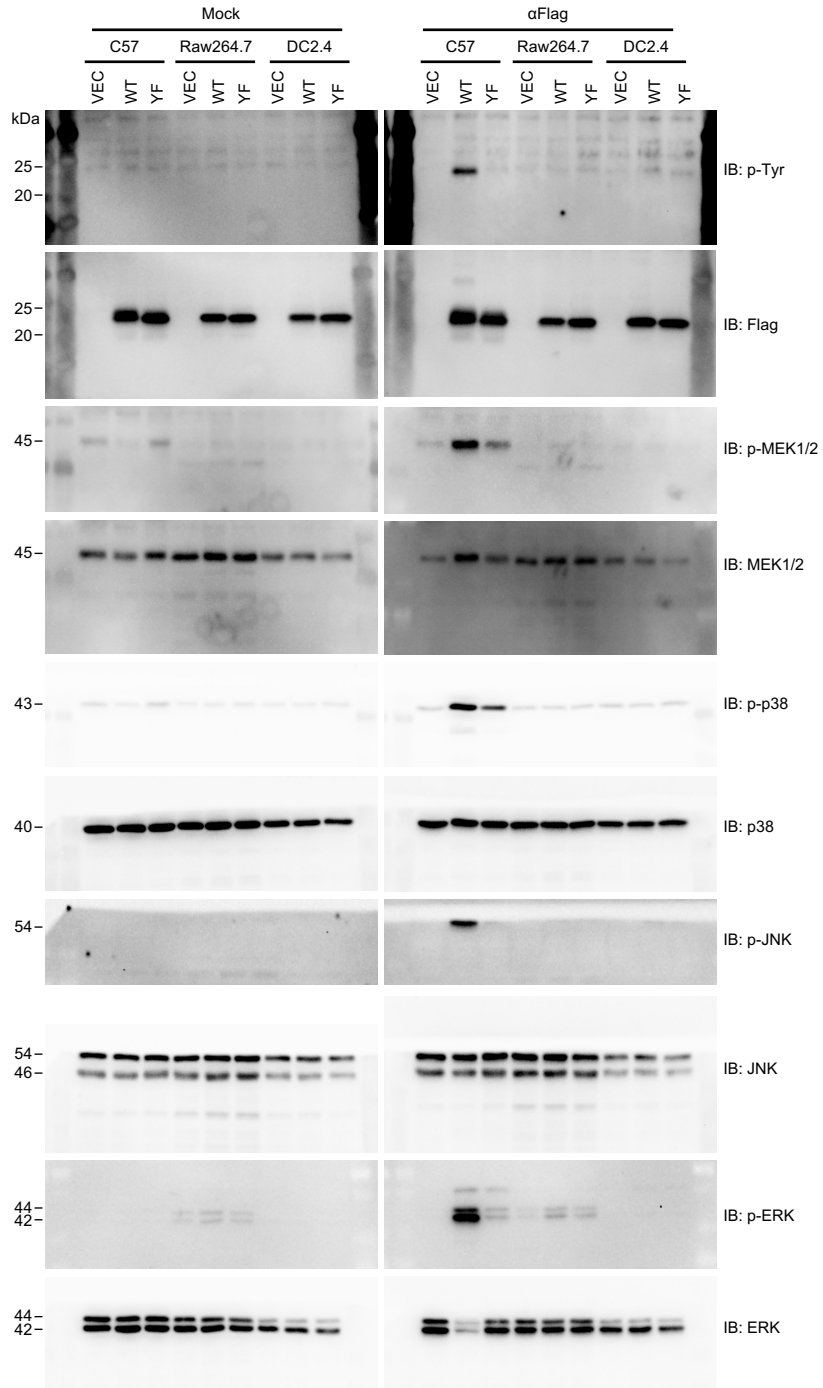**Fig. 1c**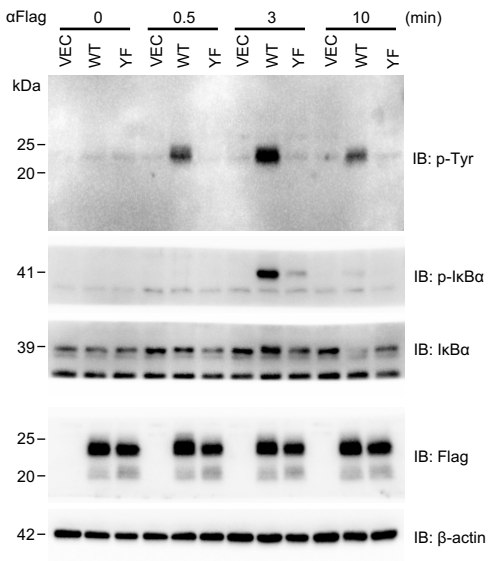

**Fig. 2a**

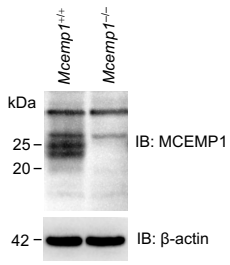

**Fig. 3a**

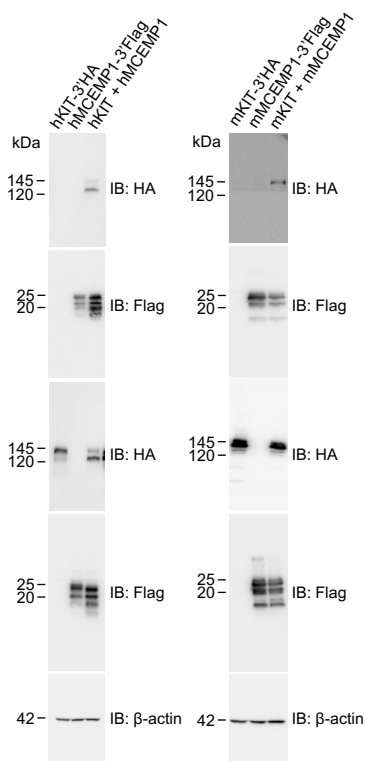

**Fig. 3b**

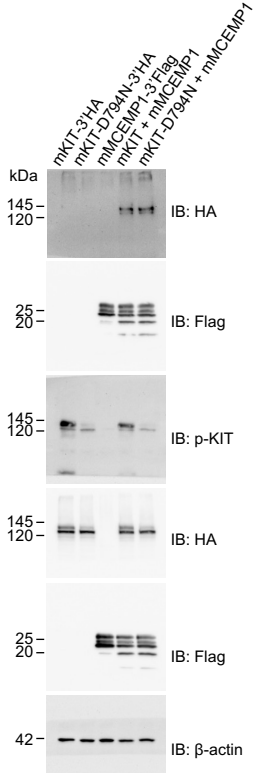

**Fig. 3c**

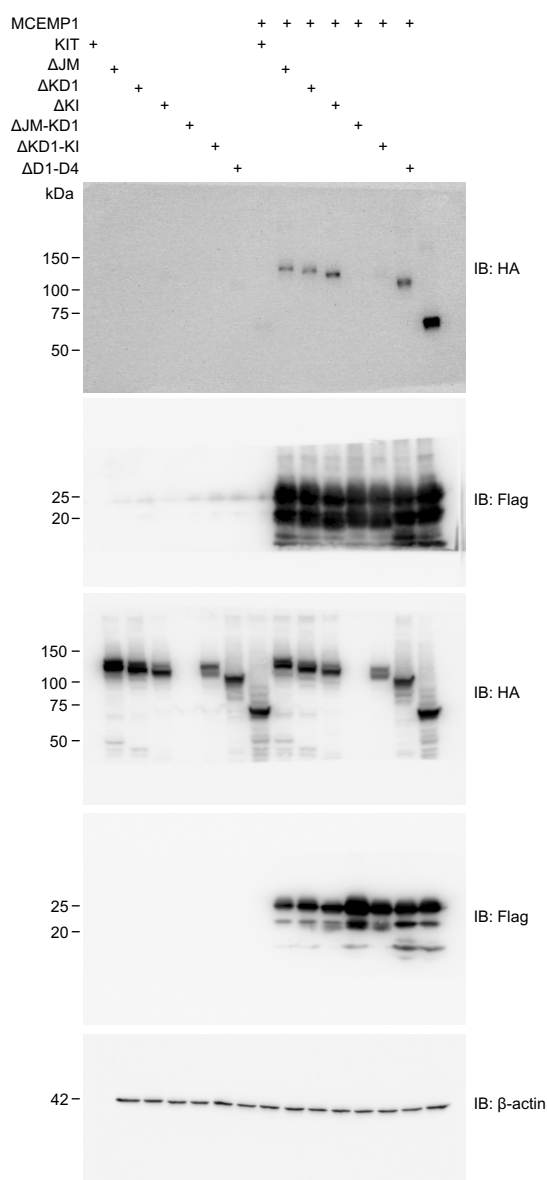

**Fig. 3d**

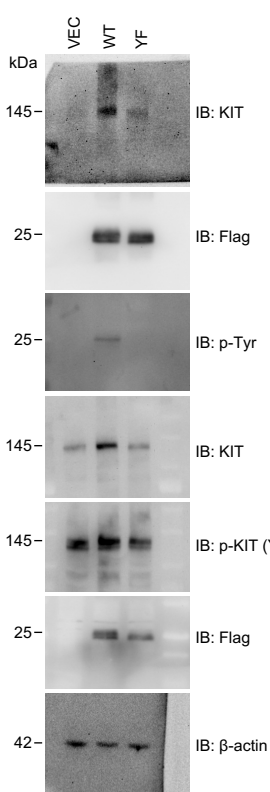

**Fig. 3e**

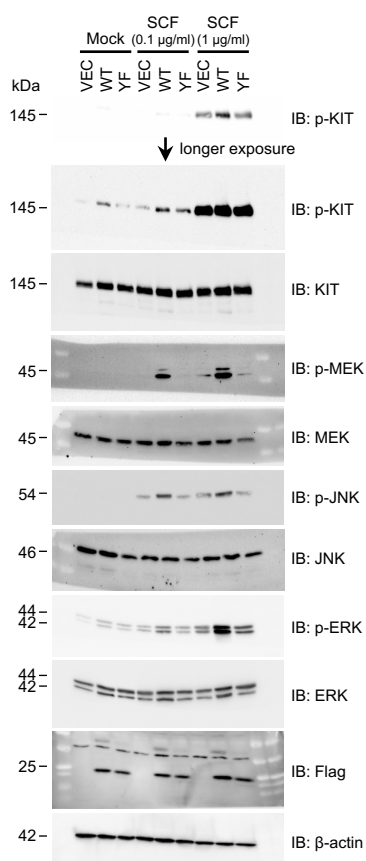

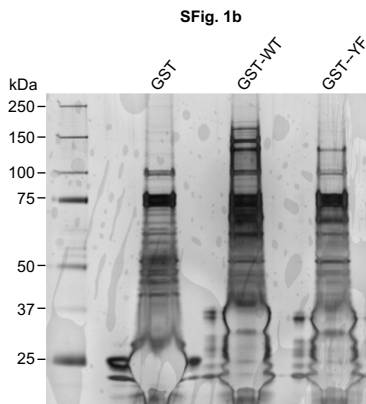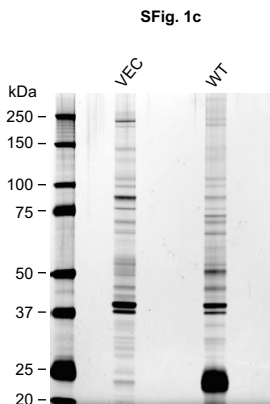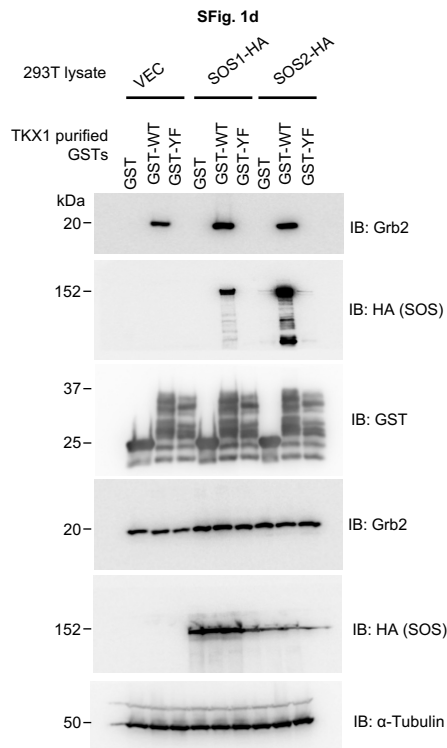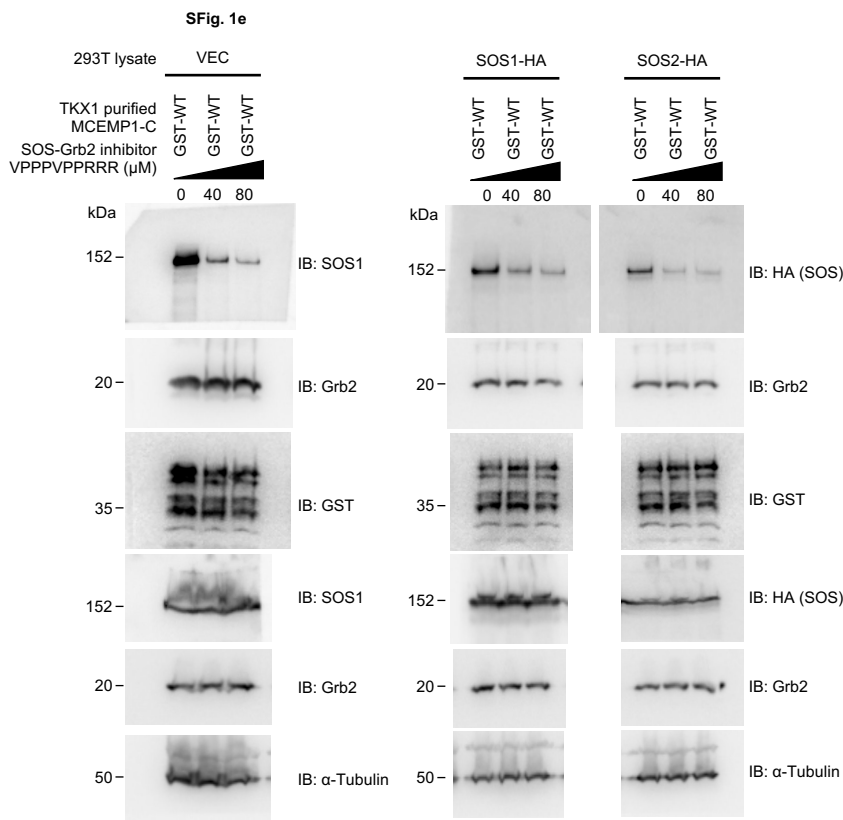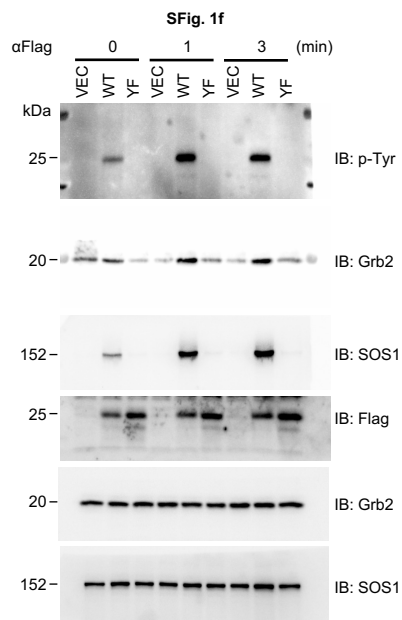

**SFig. 3a**

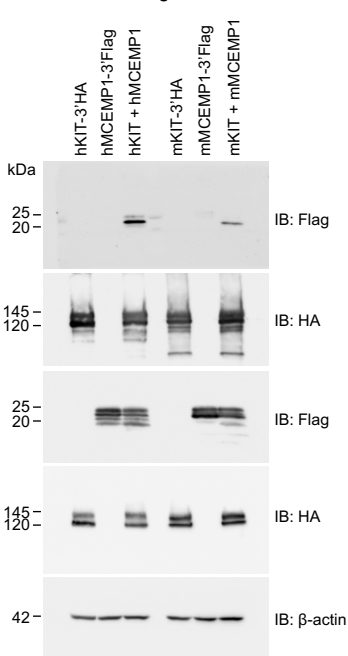

**SFig. 3b**

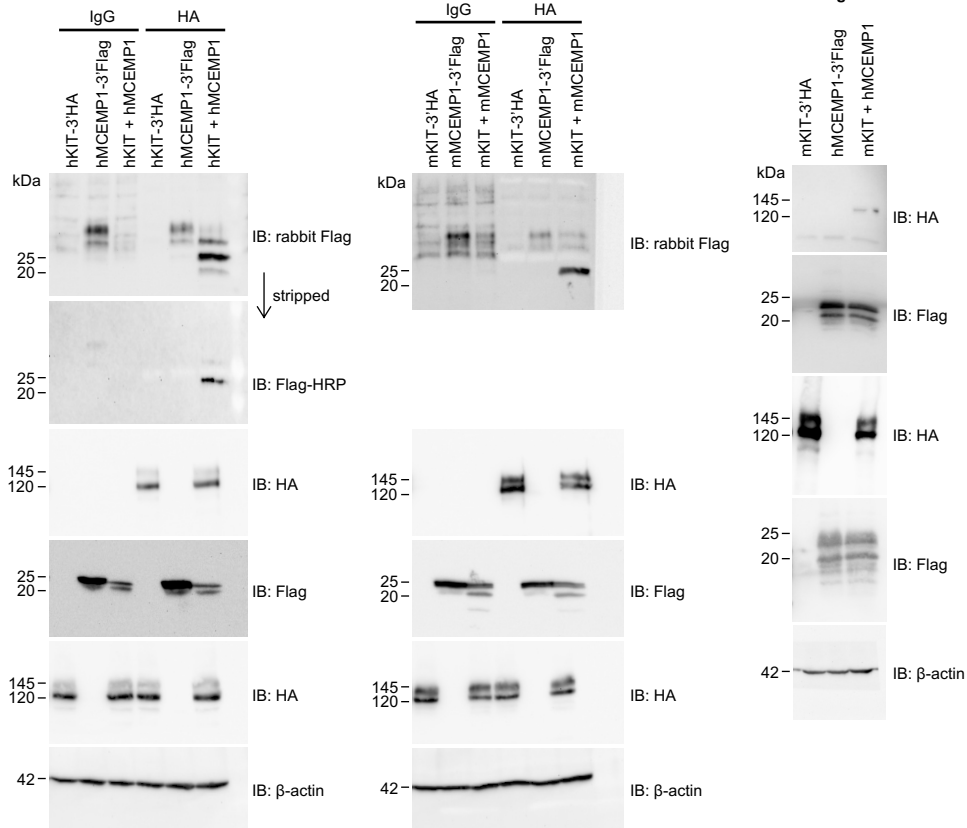

**SFig. 3c**

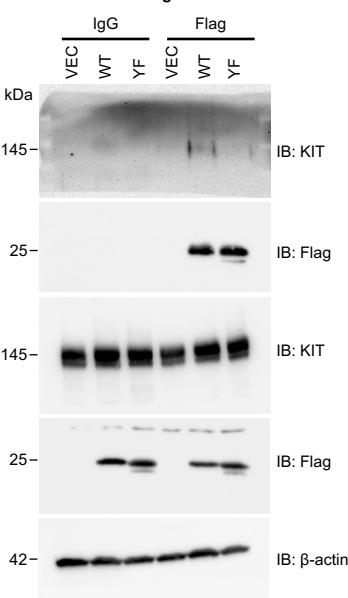

**SFig. 3d**

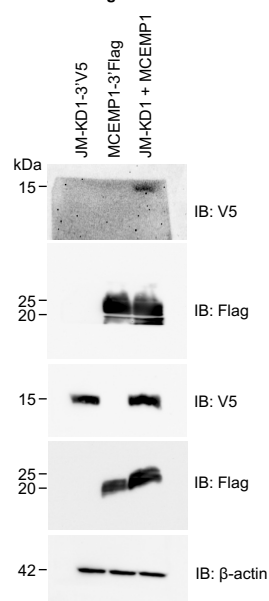

**SFig. 3e**

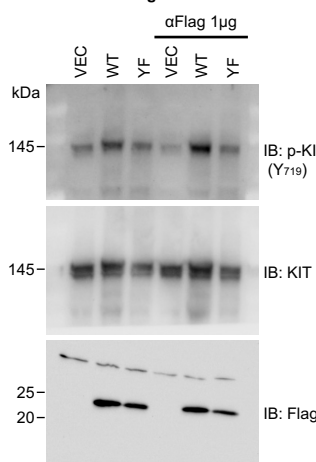

**SFig. 3f**

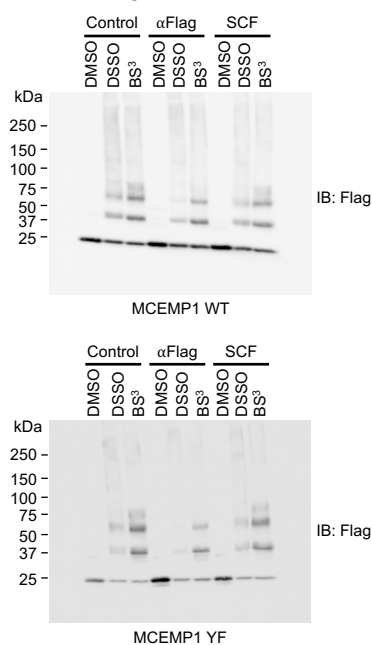

Supplement: 41467_2023_37873_MOESM1_ESM.pdf [file 41467_2023_37873_MOESM1_ESM.pdf]
